# Supplementary material
Source: PubMed Central journal article supplement (PMC7021560)
Supplement: NIHMS1538251-supplement-1.pdf [file NIHMS1538251-supplement-1.pdf]

Table e-1: Correlation matrix in full cohort.

|                         | <b>Nodular count</b> | <b>Spread/fill-sulcal</b> | <b>Spread/fill-gyral</b> | <b>Spread/fill-infratentorial</b> | <b>Spread/fill count</b> | <b>LME - Any count</b> |
|-------------------------|----------------------|---------------------------|--------------------------|-----------------------------------|--------------------------|------------------------|
| Leukocortical CL Count  | 0.02                 | 0.28                      | -0.07                    | -0.04                             | 0.11                     | 0.09                   |
| Leukocortical CL Volume | 0.14                 | 0.16                      | -0.02                    | -0.11                             | 0.08                     | 0.11                   |
| Intracortical CL Count  | -0.05                | 0.22                      | -0.08                    | -0.15                             | 0.08                     | 0.04                   |
| Intracortical CL Volume | 0.02                 | 0.12                      | -0.11                    | -0.21                             | <0.01                    | -0.01                  |
| Subpial CL Count        | <-0.01               | -0.03                     | -0.12                    | -0.20                             | -0.09                    | -0.10                  |
| Subpial CL Volume       | -0.02                | -0.01                     | -0.01                    | -0.20                             | -0.03                    | -0.03                  |
| Hippocampal CL Count    | -0.02                | <b>0.32*</b>              | 0.11                     | 0.08                              | 0.21                     | 0.17                   |
| Hippocampal CL Volume   | -0.02                | 0.27                      | 0.10                     | 0.05                              | 0.17                     | 0.14                   |
| Total CL Count          | <0.01                | 0.27                      | -0.06                    | -0.08                             | 0.11                     | 0.09                   |
| Total CL Volume         | 0.05                 | 0.17                      | 0.03                     | -0.16                             | 0.11                     | 0.11                   |
| Cortical GM Volume      | -0.18                | -0.27                     | -0.06                    | -0.23                             | -0.20                    | -0.23                  |
| Mean Cortical Thickness | 0.19                 | <b>-0.39*</b>             | <b>-0.37*</b>            | -0.29                             | <b>-0.51**</b>           | <b>-0.43**</b>         |
| Cerebral WM Volume      | 0.03                 | 0.11                      | 0.24                     | <b>0.38*</b>                      | 0.24                     | 0.24                   |
| WM Lesion Volume        | 0.14                 | 0.22                      | 0.07                     | 0.06                              | 0.13                     | 0.16                   |

Spearman correlation  $\rho$  value shown. All volumes were normalized to intracranial volume to adjust for head size prior to performing correlation testing. CL = cortical lesion. GM = gray matter. WM = white matter. LME = leptomenigeal enhancement. \* =  $p < 0.05$ . \*\* =  $p < 0.01$ .

Table e-2: Comparison of CLs and segmented volumes in those with &gt; 1 foci versus ≤ 1 foci of LME in full cohort.

|                         | Nodular                        |                                | Spread/fill-sulcal             |                                | Spread/fill-gyral              |                                | Spread/fill-infratentorial |                                | Spread/fill-All                |                                | Any LME                        |                                |
|-------------------------|--------------------------------|--------------------------------|--------------------------------|--------------------------------|--------------------------------|--------------------------------|----------------------------|--------------------------------|--------------------------------|--------------------------------|--------------------------------|--------------------------------|
|                         | > 1                            | ≤ 1                            | > 1                            | ≤ 1                            | > 1                            | ≤ 1                            | > 1                        | ≤ 1                            | > 1                            | ≤ 1                            | > 1                            | ≤ 1                            |
| Leukocortical Count     | 16 (6 – 69)                    | 17 (2 – 69)                    | 19 (6 – 69)                    | 16 (2 – 39)                    | 15.5 (2 – 69)                  | 19 (2 – 39)                    | N/A                        | 17 (2 – 69)                    | 16 (2 – 69)                    | 17.5 (2 – 39)                  | 16 (2 – 69)                    | 19.5 (2 – 39)                  |
| Leukocortical CL Volume | 254.1 (100.7 – 350.9)          | 181.2 (18.2 – 515.6)           | 213.2 (56.0 – 503.6)           | 182.6 (18.2 – 515.6)           | 179.9 (18.2 – 429.1)           | 183.6 (36.1 – 515.6)           | N/A                        | 183.6 (18.2 – 515.6)           | 198.1 (18.2 – 503.6)           | 181.2 (36.1 – 515.6)           | 198.1 (18.2 – 503.6)           | 181.2 (36.1 – 515.6)           |
| Intracortical CL Count  | 4 (0 – 10)                     | 4 (0 – 130)                    | 5.5 (0 – 13)                   | 4 (0 – 12)                     | 3.5 (0 – 13)                   | 5 (0 – 12)                     | N/A                        | 4 (0 – 13)                     | 4 (0 – 13)                     | 4.5 (0 – 12)                   | 4 (0 – 13)                     | 5 (0 – 12)                     |
| Intracortical CL Volume | 33.5 (0 – 52.7)                | 21.7 (0 – 91.1)                | 24.5 (0 – 91.1)                | 22.5 (0 – 70.9)                | 20.4 (0 – 91.1)                | 27.2 (0 – 58.3)                | N/A                        | 22.5 (0 – 91.1)                | 22.5 (0 – 91.1)                | 24.7 (0 – 57.0)                | 22.5 (0 – 91.1)                | 24.7 (0 – 57.0)                |
| Subpial CL Count        | 2 (0 – 6)                      | 2 (0 – 7)                      | 1.5 (0 – 6)                    | 2 (0 – 7)                      | 1.5 (0 – 6)                    | 2 (0 – 7)                      | N/A                        | 2 (0 – 7)                      | 1 (0 – 6)                      | 3 (0 – 7)                      | 1 (0 – 6)                      | 3 (0 – 7)                      |
| Subpial CL Volume       | 97.4 (0 – 148.8)               | 47.7 (0 – 708.70)              | 63.5 (0 – 215.4)               | 45.4 (0 – 708.7)               | 63.5 (0 – 215.4)               | 45.4 (0 – 708.7)               | N/A                        | 50.0 (0 – 708.7)               | 18.9 (0 – 215.4)               | 71.6 (0 – 708.7)               | 18.9 (0 – 215.4)               | 71.6 (0 – 708.7)               |
| Hippocampal CL Count    | 0 (0 – 2)                      | 1 (0 – 7)                      | 1.5 (0 – 7)                    | 1 (0 – 6)                      | 1.5 (0 – 7)                    | 1 (0 – 6)                      | N/A                        | 1 (0 – 7)                      | 1 (0 – 7)                      | 1 (0 – 5)                      | 1 (0 – 7)                      | 1 (0 – 5)                      |
| Hippocampal CL Volume   | 0 (0 – 13.9)                   | 0 (0 – 1)                      | 21.2 (0 – 99.1)                | 7.3 (0 – 172.0)                | 15.7 (0 – 155.7)               | 6.6 (0 – 172.0)                | N/A                        | 9.3 (0 – 172.0)                | 13.9 (0 – 155.7)               | 7.0 (0 – 172.0)                | 9.6 (0 – 155.7)                | 7.0 (0 – 172.0)                |
| Total CL Count          | 24 (8 – 69)                    | 23 (2 – 82)                    | 27 (6 – 82)                    | 23 (2 – 54)                    | 22.5 (2 – 82)                  | 25 (2 – 54)                    | N/A                        | 23 (2 – 82)                    | 23 (2 – 82)                    | 23.5 (2 – 54)                  | 23 (2 – 82)                    | 25 (2 – 54)                    |
| Total CL Volume         | 373.4 (114.6 – 529.5)          | 299.9 (18.2 – 1356.5)          | 367.8 (56.0 – 641.1)           | 290.3 (18.2 – 1356.5)          | 350.4 (18.2 – 641.1)           | 296.2 (36.1 – 1356.5)          | N/A                        | 323.7 (18.2 – 1356.5)          | 367.1 (18.2 – 641.1)           | 285.8 (36.1 – 1356.5)          | 367.1 (18.2 – 641.1)           | 285.8 (36.1 – 1356.5)          |
| Cortical GM Volume      | 475671.6 (427561.5 – 519537.1) | 471702.3 (400895.9 – 555095.6) | 468096.8 (400895.9 – 555095.6) | 471934.3 (425828.3 – 425828.3) | 464201.4 (400895.9 – 507250.3) | 486036.3 (425828.3 – 555095.6) | N/A                        | 471934.3 (400895.9 – 555095.6) | 471934.3 (400895.9 – 555095.6) | 478753.2 (425828.3 – 523555.3) | 471934.3 (400895.9 – 555095.6) | 478753.2 (425828.3 – 523555.3) |
| Mean Cortical Thickness | 3.42 (3.27 –                   | 3.41 (3.09 –                   | <b>3.30</b> ( <b>3.11</b> –    | <b>3.43*</b> ( <b>3.09</b> –   | <b>3.35</b> ( <b>3.12</b> –    | <b>3.46*</b> ( <b>3.09</b> –   | N/A                        | 3.41 (3.09 –                   | <b>3.36</b> ( <b>3.11</b> –    | <b>3.47*</b> ( <b>3.09</b> –   | 3.39 (3.11 –                   | 3.47 (3.09 –                   |

|                    | 3.47)                           | 3.65)                             | <b>3.54)</b>                      | <b>3.65)</b>                      | <b>3.54)</b>                      | <b>3.65)</b>                      |     | 3.65)                             | <b>3.56)</b>                      | <b>3.65)</b>                      | 3.56)                             | 3.65)                             |
|--------------------|---------------------------------|-----------------------------------|-----------------------------------|-----------------------------------|-----------------------------------|-----------------------------------|-----|-----------------------------------|-----------------------------------|-----------------------------------|-----------------------------------|-----------------------------------|
| Cerebral WM Volume | 430617.5<br>(376683.5 – 533693) | 445930.8<br>(373890.3 – 544424.1) | 450680.2<br>(378126.2 – 544424.1) | 445505.9<br>(373890.3 – 540483.4) | 444209.8<br>(373890.3 – 544424.1) | 446208.8<br>(381180.8 – 528407.4) | N/A | 445652.8<br>(373890.3 – 544424.1) | 445652.8<br>(373890.3 – 544424.1) | 450383.1<br>(381180.8 – 528407.4) | 446208.8<br>(373890.3 – 544424.1) | 444363.8<br>(381180.8 – 528407.4) |
| WM Lesion Volume   | 5320.0<br>(2091.8 – 18380.5)    | 2771.7<br>(51.7 – 19385.8)        | 4955.4<br>(1007.3 – 19175.7)      | 2747.5<br>(51.7 – 19385.8)        | 4569.0<br>(175.3 – 19175.7)       | 2747.5<br>(51.7 – 19385.8)        | N/A | 2821.4<br>(51.7 – 19385.8)        | 3332.3<br>(175.3 – 19175.7)       | 2753.6<br>(51.7 – 19385.8)        | 3332.3<br>(175.3 – 19175.7)       | 2717.2<br>(51.7 – 19385.8)        |

Median (range) values shown. Raw volumes (mm<sup>3</sup>) shown, but normalized values used for statistical comparisons. Mean cortical thickness in mm. Wilcoxon rank sum testing for comparisons between groups. CL = cortical lesion. GM = gray matter. WM = white matter. LME = leptomenigeal enhancement. N/A = not applicable (no participants had > 1 spread/fill-infratentorial foci). \* = p <0.05. \*\* = p <0.01.

**Figure e-1: Examples of hippocampal lesions.**

Shown are two examples of MP2RAGE T1-w images (zoomed, cropped) with red arrows indicating hippocampal lesions.

**Figure e-2: Scatter plots for correlation analyses in the full cohort.**

Scatter plots with lines of best fit shown for all significant correlations found in correlation analysis. Spearman rho ( $\rho$ ) values and levels of significance shown in each plot.

**Figure e-3: Scatter plots for correlation analyses in the RRMS subjects only.**

Scatter plots with lines of best fit shown for all significant correlations found in correlation analysis. Spearman rho ( $\rho$ ) values and levels of significance shown in each plot.

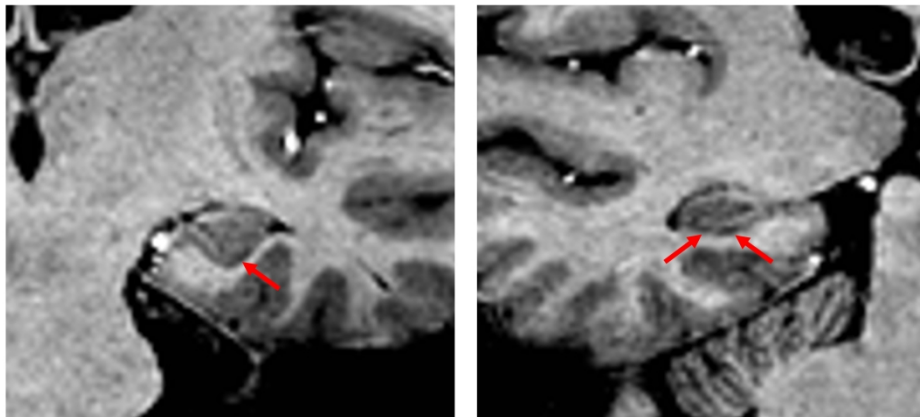

338x190mm (300 x 300 DPI)

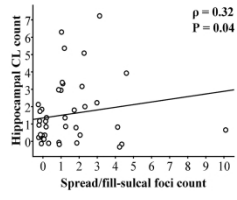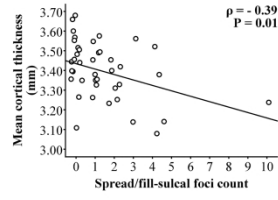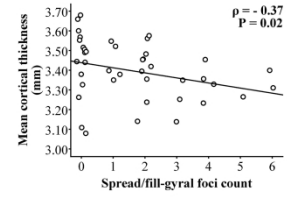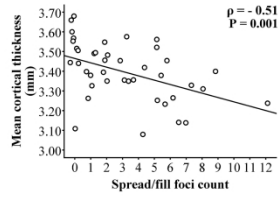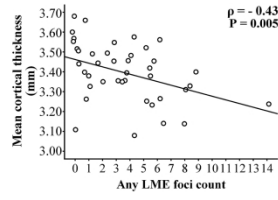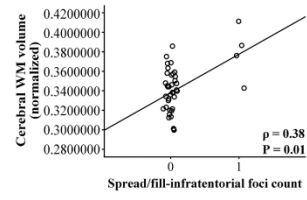

338x190mm (300 x 300 DPI)

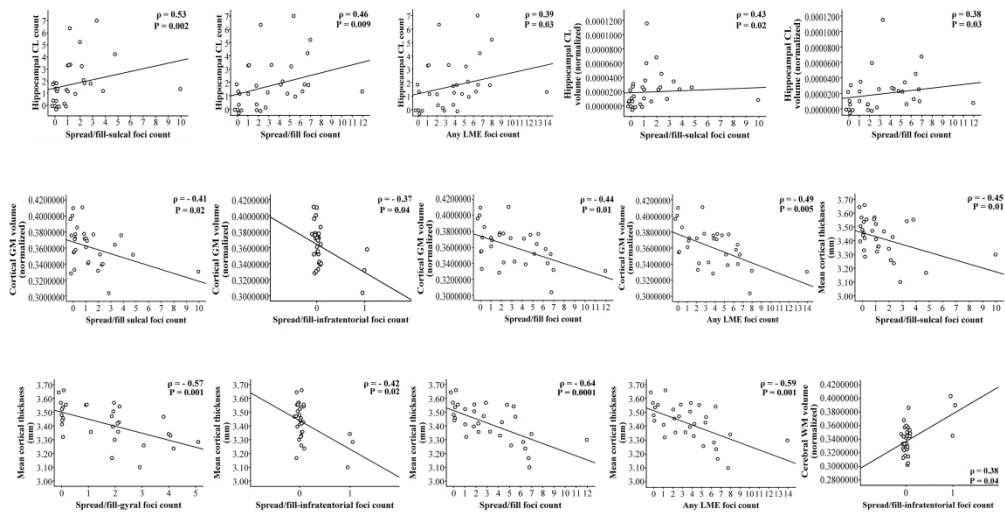

338x190mm (300 x 300 DPI)
